# Supplementary material for: Quantification of pre- and post-air plasma-treated graphene oxide dispersed polymer blends for high dielectric applications
Source: Royal Society of Chemistry journal article supplement (doi:10.1039/d1nj05595j), 2022-01-01
Supplement: d1nj05595j1.pdf [file d1nj05595j1.pdf]

## List of Tables

**Table.1** Sample configuration of PVDF/PSF/GO nano blend.

| Polymer Blends |              |                            |                                 |                                 |
|----------------|--------------|----------------------------|---------------------------------|---------------------------------|
| PVDF<br>(wt%)  | PSF<br>(wt%) | GO<br>(untreated)<br>(wt%) | GO (15 min<br>treated)<br>(wt%) | GO (30 min<br>treated)<br>(wt%) |
| 95             | 5            | -                          | -                               | -                               |
| 90             | 10           | -                          | -                               | -                               |
| 85             | 15           | -                          | -                               | -                               |
| 95             | 4.5          | 0.5                        | 0.5                             | 0.5                             |
| 90             | 9            | 1                          | 1                               | 1                               |
| 85             | 13.5         | 1.5                        | 1.5                             | 1.5                             |

**Table2.** FTIR peak assignments of virgin and modified PVDF/PSF/GO nano blends.

| Sample           | Treated/untreated<br>GO | Peak position (cm <sup>-1</sup> ) and functional groups                                                                                                                                                                            |
|------------------|-------------------------|------------------------------------------------------------------------------------------------------------------------------------------------------------------------------------------------------------------------------------|
| Pure<br>PVDF/PSF | --                      | 2970-O-H stretch, 1675-C=O stretch, 1582,1486-C=C bonding, 1400-1000-CF stretch, 1291-O=S=O-asymmetric stretch, 1144-O=S=O symmetric stretch and 876,835-CF <sub>2</sub> bonding.                                                  |
| PVDF/PSF/GO      | Untreated               | 2970-O-H stretch, 1675-C=O stretch, 1582,1486-C=C bonding, 1400,1325, 1011-CF stretch, 1291-O=S=O asymmetric stretch, 1230-C-OH stretch, 1161,1103-C-O stretch, 1144- O=S=O symmetric stretch and 876, 835-CF <sub>2</sub> bonding |
| PVDF/PSF/GO      | 15 min treated          | 2970-O-H stretch, 1675-C=O stretch, 1582,1486-C=C bonding, 1400,1325, 1011-CF stretch, 1291-O=S=O asymmetric stretch, 1230-C-OH stretch, 1103-C-O stretch, 1144- O=S=O symmetric                                                   |

|             |                |                                                                                                                                                                                                                                    |
|-------------|----------------|------------------------------------------------------------------------------------------------------------------------------------------------------------------------------------------------------------------------------------|
|             |                | stretch and 876, 835-CF <sub>2</sub> bonding                                                                                                                                                                                       |
| PVDF/PSF/GO | 30 min treated | 2970-O-H stretch, 1675-C=O stretch, 1582,1486-C=C bonding, 1400,1325, 1011-CF stretch, 1291-O=S=O asymmetric stretch, 1230-C-OH stretch, 1161,1103-C-O stretch, 1144- O=S=O symmetric stretch and 876, 835-CF <sub>2</sub> bonding |

**Table 3** Evaluation of I<sub>D</sub>/I<sub>G</sub> ratio and cluster size of pre and post treated GO.

| Sample            | Peak intensity of D band (a.u.) | Peak intensity of G band (a.u.) | I <sub>D</sub> /I <sub>G</sub> ratio | Cluster size | Significance               |
|-------------------|---------------------------------|---------------------------------|--------------------------------------|--------------|----------------------------|
| Untreated GO      | 7650 (1341 cm <sup>-1</sup> )   | 15435 (1568 cm <sup>-1</sup> )  | 0.50                                 | 8.81         | Imperfections in Structure |
| 30 min treated GO | 7612 (1329 cm <sup>-1</sup> )   | 23482 (1551 cm <sup>-1</sup> )  | 0.32                                 | 13.88        | Imperfections decreased    |
| 15 min treated GO | 3327 (1324 cm <sup>-1</sup> )   | 13501 (1551 cm <sup>-1</sup> )  | 0.25                                 | 17.62        | Imperfections decreased    |

**Table4.** Calculated parameters of virgin and modified PVDF/PSF/GO nanoblends.

| Polymer Blend      | Filler                            | Crystallite size D (nm) | Interplanar spacing d (Å) | Degree of crystallinity (%) |
|--------------------|-----------------------------------|-------------------------|---------------------------|-----------------------------|
| PVDF/PSF (95/05)   | -                                 | 9.52                    | 4.69                      | 27.72                       |
| PVDF/PSF (90/10)   | -                                 | 9.70                    | 4.69                      | 26.36                       |
| PVDF/PSF (85/15)   | -                                 | 9.62                    | 4.52                      | 20.83                       |
| PVDF/PSF (95/4.5)  | Untreated GO (0.5wt%)             | 8.92                    | 3.51                      | 40.10                       |
| PVDF/PSF (90/09)   | Untreated GO (1wt%)               | 7.69                    | 3.34                      | 42.28                       |
| PVDF/PSF (85/13.5) | Untreated GO (1.5wt%)             | 5.65                    | 3.23                      | 43.12                       |
| PVDF/PSF (95/4.5)  | 15 min plasma treated GO (0.5wt%) | 6.61                    | 3.14                      | 28.25                       |
| PVDF/PSF (90/09)   | 15 min plasma treated GO (1 wt%)  | 5.39                    | 3.11                      | 31.35                       |
| PVDF/PSF (85/13.5) | 15 min plasma treated GO (1.5wt%) | 4.82                    | 3.11                      | 35.27                       |
| PVDF/PSF (95/4.5)  | 30 min plasma treated GO (0.5wt%) | 5.80                    | 3.02                      | 23.96                       |
| PVDF/PSF (90/09)   | 30 min plasma treated GO (1wt%)   | 5.47                    | 2.98                      | 30.40                       |
| PVDF/PSF (85/13.5) | 30 min plasma treated GO (1.5wt%) | 5.14                    | 2.97                      | 33.77                       |

**Table5.** Dielectric properties of virgin and modified PVDF/PSF/GO nano blends

| Polymer Blend      | Filler                            | $\epsilon_r$ | $\tan\delta$ | Frequency (Hz) |
|--------------------|-----------------------------------|--------------|--------------|----------------|
| PVDF/PSF (95/05)   | -                                 | 82           | 2.52         | 10             |
| PVDF/PSF (90/10)   | -                                 | 58           | 3.16         | 10             |
| PVDF/PSF (85/15)   | -                                 | 89           | 2.10         | 10             |
| PVDF/PSF (95/4.5)  | Untreated GO (0.5wt%)             | 213          | 3.13         | 10             |
| PVDF/PSF (90/09)   | Untreated GO (1wt%)               | 273          | 4.17         | 10             |
| PVDF/PSF (85/13.5) | Untreated GO (1.5wt%)             | 180          | 1.61         | 10             |
| PVDF/PSF (95/4.5)  | 15 min plasma treated GO (0.5wt%) | 222          | 3            | 10             |
| PVDF/PSF (90/09)   | 15 min plasma treated GO (1 wt%)  | 250          | 2.47         | 10             |
| PVDF/PSF (85/13.5) | 15 min plasma treated GO (1.5wt%) | 208          | 2.63         | 10             |
| PVDF/PSF (95/4.5)  | 30 min plasma treated GO (0.5wt%) | 296          | 2.21         | 10             |
| PVDF/PSF           | 30 min plasma                     | 360          | 2.83         | 10             |

|                       |                                      |     |      |    |
|-----------------------|--------------------------------------|-----|------|----|
| (90/09)               | treated GO (1wt%)                    |     |      |    |
| PVDF/PSF<br>(85/13.5) | 30 min plasma<br>treated GO (1.5wt%) | 260 | 1.97 | 10 |
